# Supplementary material for: Acidic Pre-Conditioning Enhances the Stem Cell Phenotype of Human Bone Marrow Stem/Progenitor Cells
Source: MDPI journal article supplement (doi:10.3390/ijms20051097), 2019-03-04
Supplement: s1 [file s1]

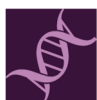

## Supplemental Material

### *Communication*

### **Acidic Pre-Conditioning Enhances the Stem Cell Phenotype of Human Bone Marrow Stem/Progenitor Cells**

Yuri Hazehara-Kunitomo <sup>1</sup>, Emilio Satoshi Hara <sup>2,\*</sup>, Mitsuaki Ono <sup>3,\*</sup>, Kyaw Thu Aung <sup>1</sup>, Keiko Komi <sup>1</sup>, Hai Thanh Pham <sup>1,4,5</sup>, Kentaro Akiyama <sup>1</sup>, Masahiro Okada <sup>2</sup>, Toshitaka Oohashi <sup>3</sup>, Takuya Matsumoto <sup>2</sup> and Takuo Kuboki <sup>1,\*</sup>

### **Supplemental Figure S1**

Effect of short-term treatment of pH 6.4 on stem cell properties of BMSCs.

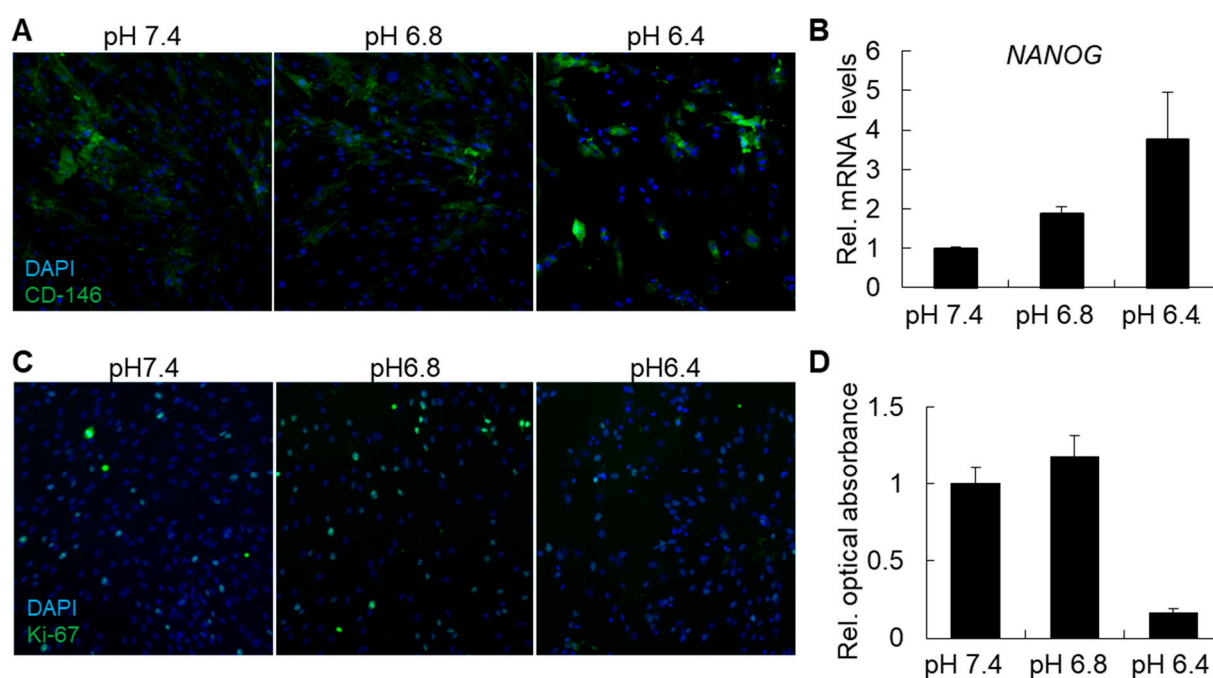

**Figure S1.** Immunocytochemical analysis for (A) expression of CD146 and (B) relative mRNA expression levels of *NANOG* in hBMSCs after a short-term treatment in pH 6.8 and pH 6.4. Note the substantial increase in stem cell markers in pH 6.4. Immunocytochemical analysis for (C) expression of the proliferation marker Ki-67, and (D) cell viability,

determined by MTS assay in hBMSCs after a short-term treatment in pH 6.8 and pH 6.4.

Note the dramatic decrease in cell proliferation ability and cell viability in pH 6.4.
